# Supplementary material
Source: publisher figshare collection journal article supplement (https://acs.figshare.com/ndownloader/files/4656778)
Supplement: Supplementary file 1 [file 4656778]

# Supporting Information

## **Controlled Synthesis and Upconverted Avalanche Luminescence of Cerium(III) and Neodymium(III) Orthovanadate Nanocrystals with High Uniformity of Size and Shape**

Hong Deng,<sup>†</sup> Shihe Yang<sup>\*,†</sup>

*<sup>†</sup>Department of Chemistry, The Hong Kong University of Science and Technology, Clear  
Water Bay, Kowloon, Hong Kong, China*

Si Xiao<sup>‡</sup>, Hong-Mei Gong<sup>‡</sup>, Qu-Quan Wang<sup>\*,‡</sup>

*<sup>‡</sup>Department of Physics and Key Laboratory of Acoustic and Photonic Materials and  
Devices of Ministry of Education, Wuhan University, Wuhan 430072, China*

\* To whom correspondence should be addressed: chsyang@ust.hk, qqwang@whu.edu.cn.

1. AFM images of square-plate and H-like NCs of CeVO<sub>4</sub> for height analysis.

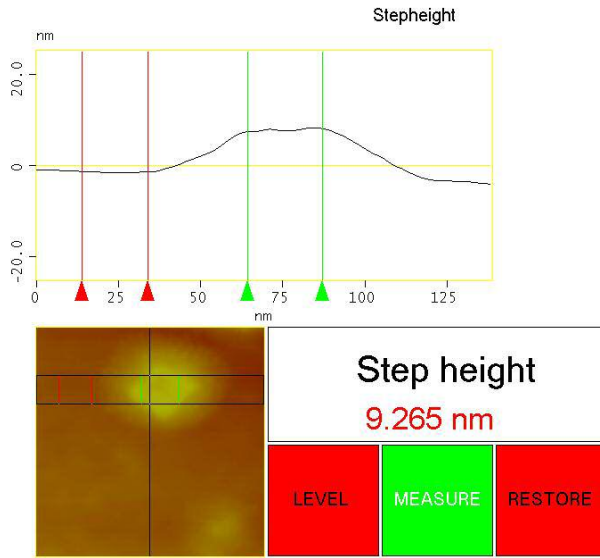

15614.003  
File: default

**Figure S1.** AFM image of a single CeVO<sub>4</sub> square-plate NC. The step height corresponds to the thickness of the NC.

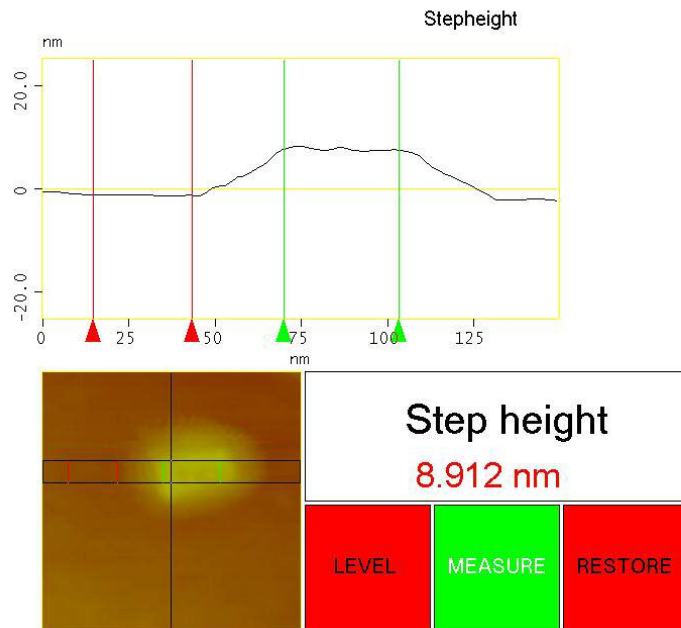

15614.003  
File: default

**Figure S2.** AFM image of a single CeVO<sub>4</sub> H-like NC. The step height corresponds to the thickness of the NC.

2. TEM images of  $\text{CeVO}_4$  H-like NCs showing the effect of reaction time.

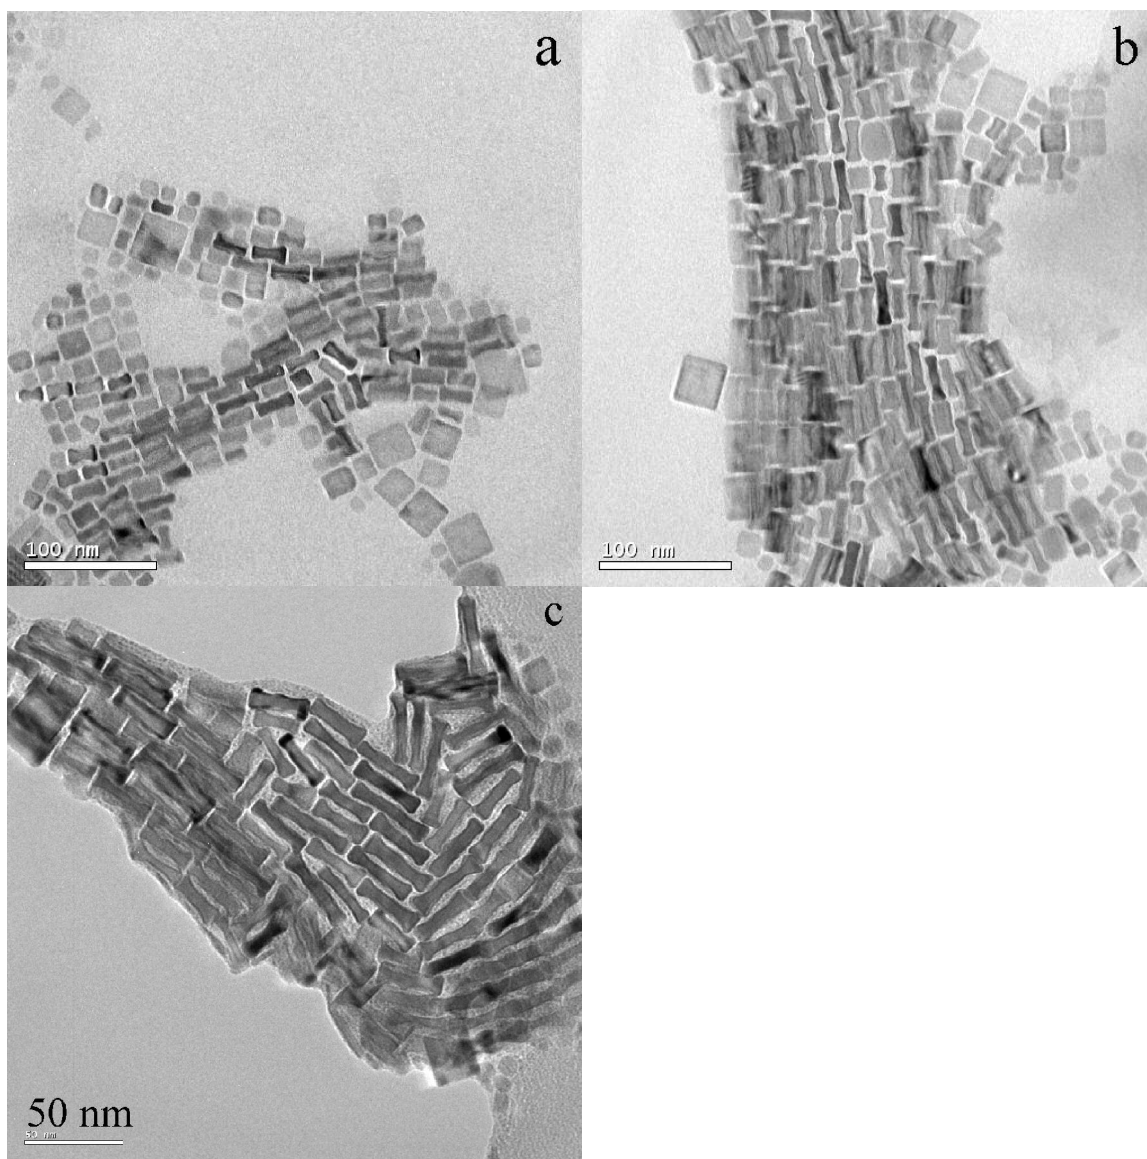

**Figure S3.** TEM images of  $\text{CeVO}_4$  H-like NCs prepared after reaction for 10 h (a), 16 h (b) and 20 h (c). The initial pH of the reaction mixture was  $\text{pH} = 11$ .
